# Supplementary material for: Liquid-phase synthesis of the Li10GeP2S12-type phase in the Li–Si–P–S–Cl system
Source: Royal Society of Chemistry journal article supplement (doi:10.1039/d2ta02834d), 2022-01-01
Supplement: d2ta02834d1.pdf [file d2ta02834d1.pdf]

## Supporting Information for

### **Liquid-phase synthesis of the $\text{Li}_{10}\text{GeP}_2\text{S}_{12}$ -type phase in the Li–Si–P–S–Cl system**

Tomohiro Ito <sup>ab</sup>, Satoshi Hori <sup>c</sup>, Masaaki Hirayama <sup>bc</sup>, and Ryoji Kanno\*<sup>c</sup>

<sup>a</sup> Mitsubishi Gas Chemical Company, Inc., Mitsubishi Building 5-2, Marunouchi 2-chome Chiyoda-ku, Tokyo 100-8324, Japan

<sup>b</sup> Department of Chemical Science and Engineering, School of Materials and Chemical Technology, Tokyo Institute of Technology, 4259 Nagatsuta, Midori, Yokohama 226-8502, Japan

<sup>c</sup> Research Center for All-Solid-State Battery, Institute of Innovative Research (IIR), Tokyo Institute of Technology, 4259 Nagatsuta, Midori, Yokohama 226-8502, Japan.

**\*Corresponding Author:** (R.K.) E-mail: [kanno@echem.titech.ac.jp](mailto:kanno@echem.titech.ac.jp)

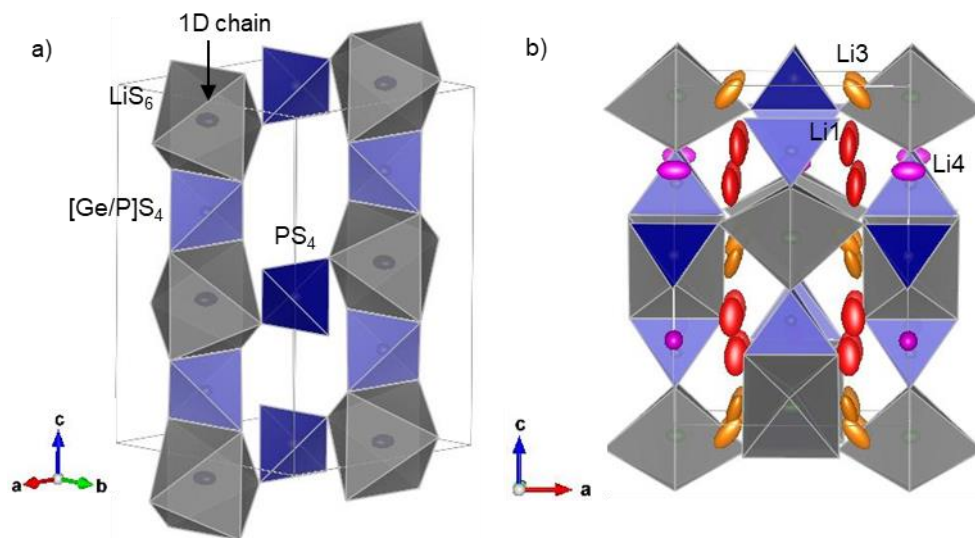

**Figure S1.** Crystal structure of  $\text{Li}_{10}\text{GeP}_2\text{S}_{12}$ .<sup>1</sup> a) Perspective view of the one-dimensional (1D) chains, which are formed from  $\text{LiS}_6$  octahedra and  $[\text{Ge/P}]\text{S}_4$  tetrahedra with a common edge. The chains are connected by  $\text{PS}_4$  tetrahedra with corner sharing. b) Li ion distribution in the scaffold composed of polyhedral structural units.

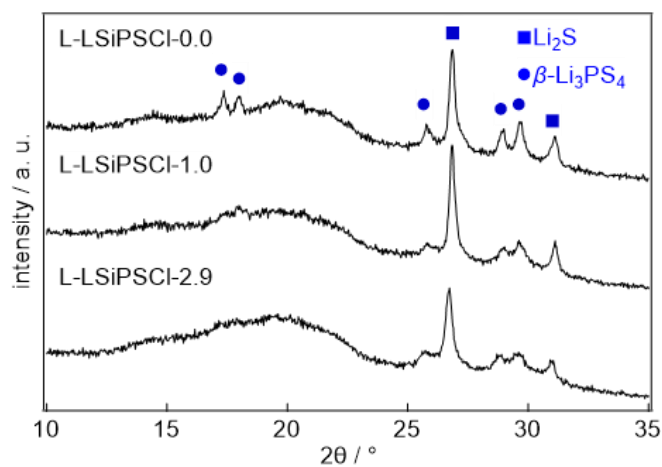

**Figure S2.** XRD patterns of precursor powder for the L-LSiPSCI-X ( $X = 0.0, 1.0, \text{ and } 2.9$ ) samples.

**Table S1.** Lattice parameters and volume of the L-LSiPSCI- $X$  ( $X = 0.0, 1.0,$  and  $2.9$ ) and S-LSiPSCI samples.

| Sample <sup>a</sup> | $a / \text{\AA}$ | $c / \text{\AA}$ | $V / \text{\AA}^3$ |
|---------------------|------------------|------------------|--------------------|
| L-LSiPSCI-0.0       | 8.68774(12)      | 12.54775(27)     | 947.06(7)          |
| L-LSiPSCI-1.0       | 8.71090(9)       | 12.56748(21)     | 953.62(5)          |
| L-LSiPSCI-2.9       | 8.70988(10)      | 12.56599(23)     | 953.28(6)          |
| S-LSiPSCI           | 8.71020(10)      | 12.56738(25)     | 953.46(6)          |

<sup>a</sup> The crystal structure model for  $\text{Li}_{9.54}\text{Si}_{1.74}\text{P}_{1.44}\text{S}_{11.7}\text{Cl}_{0.3}$  at 298K in the previous report<sup>2</sup> was considered as a reference material and used as the initial model in the refinement.

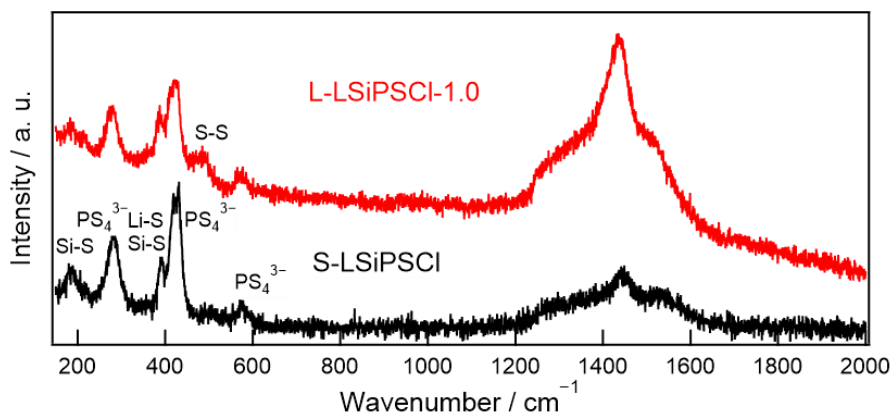

**Figure S3.** Micro-Raman spectra of L-LSiPSCI-1.0 and S-LSiPSCI in the range of 150–2000  $\text{cm}^{-1}$ . The micro-Raman spectra were measured using a Lambda Vision Micro-RAM300 spectrometer at an excitation wavelength of 532 nm. The spectral peaks were assigned as follows: 280, 440, and 570  $\text{cm}^{-1}$  (P-S bonds of the  $\text{PS}_4^{3-}$  ion),<sup>3</sup> 190  $\text{cm}^{-1}$  (Si-S bonds of the  $\text{SiS}_4$  tetrahedra), and 390  $\text{cm}^{-1}$  (Si-S bonds of the  $\text{SiS}_4$  tetrahedra, Li-S bonds of the  $\text{LiS}_6$  octahedra).<sup>4, 5</sup> These peaks originated from the main phase crystal (LGPS-type phase), and no significant differences in the peak intensities were observed between L-LSiPSCI-1.0 and S-LSiPSCI. The peak at  $\sim 480 \text{ cm}^{-1}$  was attributed only to the S-S bond of L-LSiPSCI-1.0,<sup>6</sup> and so its presence was consistent with the fact that an excess of sulfur had been added during the synthetic process. In addition, the peak at  $\sim 1440 \text{ cm}^{-1}$  was attributed to carbon-related bonds,<sup>5</sup> and the intensity of this peak for L-LSiPSCI-1.0 was larger than that for S-LSiPSCI, suggesting that carbon-containing species were generated from the solvent used in the liquid-phase synthetic process.

## References

- 1 T. Yajima, Y. Hinuma, S. Hori, R. Iwasaki, R. Kanno, T. Ohhara, A. Nakao, K. Munakata and Z. Hiroi, *J. Mater. Chem. A.*, 2021, **9**, 11278–11284.
- 2 Y. Kato, S. Hori, T. Saito, K. Suzuki, M. Hirayama, A. Mitsui, M. Yonemura, H. Iba and R. Kanno, *Nat. Energy*, 2016, **1**, 16030.
- 3 H. Muramatsu, A. Hayashi, T. Ohtomo, S. Hama and M. Tatsumisago, *Solid State Ionics*, 2011, **182**, 116–119.
- 4 Y. Sun, K. Suzuki, K. Hara, S. Hori, T. Yano, M. Hara, M. Hirayama and R. Kanno, *J. Power Sources*, 2016, **324**, 798–803.
- 5 K.-H. Kim and S. W. Martin, *Chem. Mater.*, 2019, **31**, 3984–3991.
- 6 X. Chen, L. Peng, L. Wang, J. Yang, Z. Hao, J. Xiang, K. Yuan, Y. Huang, B. Shan, L. Yuan and J. Xie, *Nat. Commun.*, 2019, **10**, 1021.
